# Supplementary material for: Transglycosylation of Steviol Glycosides and Rebaudioside A: Synthesis Optimization, Structural Analysis and Sensory Profiles
Source: MDPI journal article supplement (doi:10.3390/foods9121753), 2020-11-26
Supplement: s1 [file s1]

## Supplementary Material

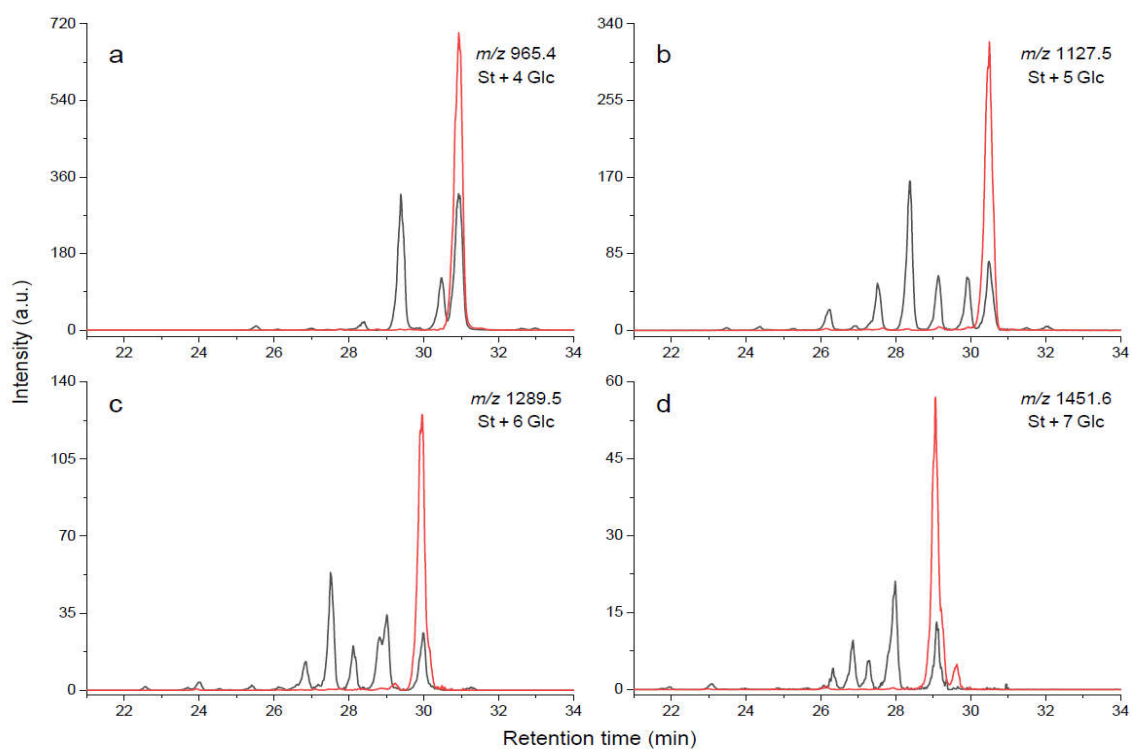

**Figure 1.** Extracted ion chromatograms for glucosylated products of SVglys (black line) and RebA (red line) corresponding to  $m/z$  965.4 (a), 1127.5 (b), 1289.5 (c) and 1451.6 (d).
